# Supplementary material
Source: publisher figshare collection journal article supplement (https://aacr.figshare.com/articles/dataset/_/22371558)

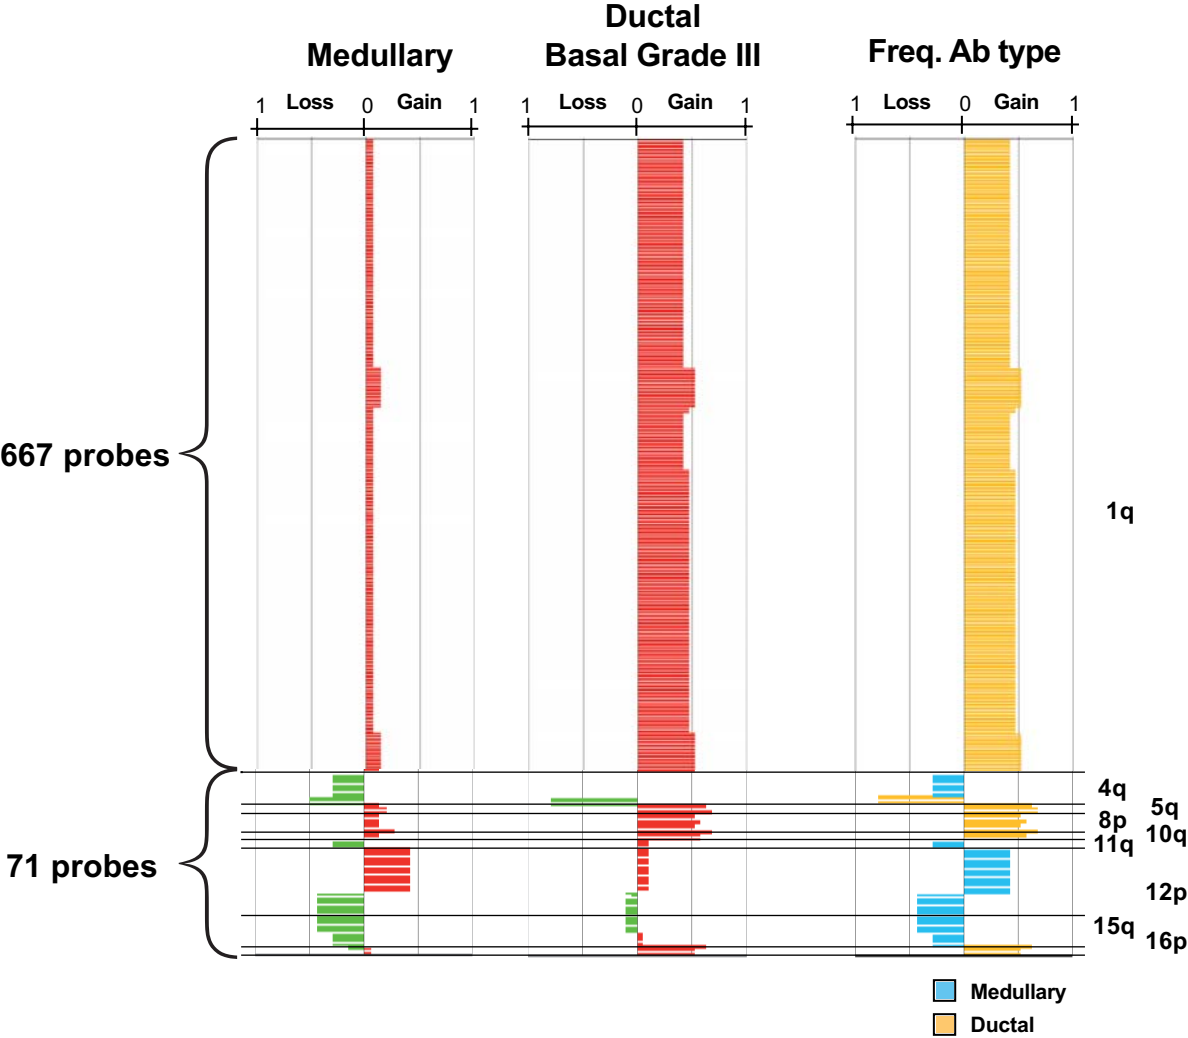

**Figure S10**

Supplement: Supplementary file 1 [file 39816657]
